# Supplementary material
Source: PubMed Central journal article supplement (PMC2995351)
Supplement: blood-2010-04-281071_1.pdf [file blood-2010-04-281071_1.pdf]

**Table S1. Hematopoietic composition of older *mcl-1* transgenic mice**

| <u>Organ / Cell type</u>               | <u>6 mo</u>     |                         | <u>12 mo</u>    |                         |
|----------------------------------------|-----------------|-------------------------|-----------------|-------------------------|
|                                        | <u>C57BL/6J</u> | <u><i>mcl-1(33)</i></u> | <u>C57BL/6J</u> | <u><i>mcl-1(33)</i></u> |
| <u>Peripheral blood</u>                | 4.60±0.71       | <b>10.74±2.32**</b>     | 3.66±1.24       | <b>18.90±7.03**</b>     |
| CD4 <sup>+</sup> CD8 <sup>-</sup>      | 0.64±0.24       | <b>1.39±0.13**</b>      | 0.32±0.22       | <b>1.34±0.46**</b>      |
| CD4 <sup>-</sup> CD8 <sup>+</sup>      | 0.49±0.22       | <b>1.73±0.40**</b>      | 0.38±0.17       | <b>2.33±0.64**</b>      |
| B220 <sup>+</sup> IgM/IgD <sup>-</sup> | 0.07±0.01       | <b>0.42±0.23*</b>       | 0.11±0.03       | <b>1.02±0.56*</b>       |
| B220 <sup>+</sup> IgM/IgD <sup>+</sup> | 1.69±0.55       | <b>4.97±1.58**</b>      | 1.59±1.02       | <b>11.00±4.76**</b>     |
| Mac1 <sup>+</sup>                      | 0.55±0.08       | 1.09±0.48               | 0.24±0.06       | <b>1.45±0.91*</b>       |
| Mac1 <sup>+</sup> Gr1 <sup>+</sup>     | 0.20±0.07       | 0.27±0.07               | 1.51±0.42       | <b>6.15±2.18**</b>      |
| <u>Spleen</u>                          | 78.84±25.91     | <b>261.40±73.22**</b>   | 88.34±36.63     | <b>228.02±54.85**</b>   |
| CD4 <sup>+</sup> CD8 <sup>-</sup>      | 16.16±5.52      | <b>30.23±4.9**</b>      | 12.92±7.07      | <b>41.56±10.88**</b>    |
| CD4 <sup>-</sup> CD8 <sup>+</sup>      | 11.31±3.93      | <b>27.7±7.98*</b>       | 6.36±3.09       | <b>20.98±5.29**</b>     |
| B220 <sup>+</sup> IgM/IgD <sup>-</sup> | 5.10±2.73       | <b>21.19±9.11*</b>      | 9.55±8.99       | <b>34.49±14.33*</b>     |
| B220 <sup>+</sup> IgM/IgD <sup>+</sup> | 34.57±10.99     | <b>111.97±23.37***</b>  | 41.27±13.82     | <b>87.91±21.28*</b>     |
| Mac1 <sup>+</sup>                      | 4.27±0.93       | <b>9.62±2.58**</b>      | 7.01±2.16       | 10.69±2.28              |
| Mac1 <sup>+</sup> Gr1 <sup>+</sup>     | 1.02±0.41       | 1.60±1.03               | 5.29±1.99       | 5.74±1.91               |
| Ter-119 <sup>+</sup>                   | 5.87±5.91       | <b>24.84±13.81*</b>     | 12.42±7.87      | <b>31.95±3.50**</b>     |
| <u>LN</u>                              | 15.74±3.39      | <b>46.52±14.14**</b>    | 10.80±4.27      | <b>26.07±1.84***</b>    |
| CD4 <sup>+</sup> CD8 <sup>-</sup>      | 4.87±.95        | <b>15.77±3.46***</b>    | 2.49±1.03       | <b>6.94±1.00***</b>     |
| CD4 <sup>-</sup> CD8 <sup>+</sup>      | 4.81±.80        | <b>14.16±4.17**</b>     | 1.90±0.93       | <b>6.18±0.70***</b>     |
| B220 <sup>+</sup> IgM/IgD <sup>-</sup> | 0.62±0.09       | <b>4.19±2.44*</b>       | 0.43±0.16       | <b>2.03±0.37***</b>     |
| B220 <sup>+</sup> IgM/IgD <sup>+</sup> | 4.83±1.78       | <b>9.97±3.22*</b>       | 5.65±2.46       | <b>10.17±1.48*</b>      |
| <u>BM</u>                              | 31.26±4.96      | 25.50±3.66              | 26.97±6.51      | 26.28±2.03              |
| Ter-119 <sup>+</sup>                   | 12.41±1.71      | <b>8.30±1.55*</b>       | 7.74±1.30       | <b>5.16±1.35*</b>       |
| Thy1 <sup>+</sup>                      | 1.67±0.16       | <b>2.20±0.38*</b>       | 1.67±0.52       | 2.07±0.39               |
| B220 <sup>+</sup> IgM/IgD <sup>-</sup> | 1.80±0.38       | 1.52±0.45               | 1.62±0.63       | 2.37±0.96               |
| B220 <sup>+</sup> IgM/IgD <sup>+</sup> | 2.05±0.24       | <b>3.85±0.75**</b>      | 1.98±0.28       | <b>3.75±0.80**</b>      |
| Mac1 <sup>+</sup>                      | 6.56±0.86       | 5.51±1.05               | 3.31±0.98       | 3.04±0.66               |
| Mac1 <sup>+</sup> Gr1 <sup>+</sup>     | 0.42±0.04       | <b>0.36±0.02*</b>       | 11.67±2.20      | 9.71±0.56               |
| <u>Thymus</u>                          | 89.72±22.68     | <b>170.28±26.13**</b>   | 63.76±10.14     | <b>82.89±8.27*</b>      |
| CD4 <sup>-</sup> CD8 <sup>-</sup>      | 5.90±1.21       | 7.89±1.53               | 13.97±15.07     | 9.11±3.78               |
| CD4 <sup>+</sup> CD8 <sup>+</sup>      | 73.53±21.53     | <b>147.05±21.18**</b>   | 50.04±6.01      | <b>62.77±3.24**</b>     |
| CD4 <sup>+</sup> CD8 <sup>-</sup>      | 5.73±1.33       | <b>8.97±1.59*</b>       | 4.81±1.88       | 6.41±2.53               |
| CD4 <sup>-</sup> CD8 <sup>+</sup>      | 4.56±1.22       | 6.39±2.00               | 3.12±1.00       | 4.59±1.43               |

Nucleated cells x 10<sup>6</sup>, except peripheral blood cells x 10<sup>6</sup>/ml.

Nucleated cells (mean ± SD), 4 female mice per genotype.

Significantly different to WT at same age \* P< 0.05 \*\* P< 0.01 \*\*\* P< 0.001

(Student's T test)

**Table S2. *vavP-mcl-1* tumor phenotype**

| <b>Age(d)</b>           | <b>Mouse</b> | <b>Immunophenotype</b>                                                                                                            |
|-------------------------|--------------|-----------------------------------------------------------------------------------------------------------------------------------|
| <b><i>mcl-1(33)</i></b> |              |                                                                                                                                   |
| 176                     | 33#29        | Primitive progenitor cell <sup>a</sup> (CD4 <sup>+</sup> Thy1 <sup>+</sup> Gr1 <sup>-</sup> )                                     |
| 312                     | 33#37        | Primitive progenitor cell <sup>a</sup> (CD4 <sup>+</sup> Thy1 <sup>+</sup> Gr1 <sup>-</sup> )                                     |
| 231                     | 33#81        | Primitive progenitor cell <sup>a</sup> (CD4 <sup>+</sup> Thy1 <sup>+</sup> Gr1 <sup>-</sup> )                                     |
| 247                     | 33#90        | Primitive progenitor cell <sup>a</sup> (CD4 <sup>+</sup> Thy1 <sup>+</sup> Gr1 <sup>-</sup> )                                     |
| 208                     | 33#152       | Primitive progenitor cell <sup>a</sup> (CD4 <sup>+</sup> Thy1 <sup>+</sup> Gr1 <sup>lo</sup> )                                    |
| 359                     | 33#30        | Pre B cell <sup>b</sup>                                                                                                           |
| 204                     | 33#106       | Pre B cell <sup>b</sup>                                                                                                           |
| 537                     | 33#48        | B cell <sup>c</sup>                                                                                                               |
| 473                     | 33#150       | B cell <sup>c</sup>                                                                                                               |
| 498                     | 33#18        | Myeloid <sup>d</sup> (Mac1 <sup>+</sup> Gr1 <sup>+</sup> CD43 <sup>+</sup> Sca1 <sup>-</sup> B220 <sup>-</sup> CD4 <sup>-</sup> ) |
| <b><i>mcl-1(4)</i></b>  |              |                                                                                                                                   |
| 525                     | 4#34         | Primitive progenitor cell <sup>a</sup> (CD4 <sup>-</sup> Thy1 <sup>lo+</sup> Gr1 <sup>+</sup> Mac1 <sup>+</sup> )                 |
| 511                     | 4#39         | Primitive progenitor cell <sup>a</sup> (CD4 <sup>+</sup> CD8 <sup>+</sup> Thy1 <sup>+</sup> Gr1 <sup>-</sup> )                    |
| 511                     | 4#40         | Primitive progenitor cell <sup>a</sup> (CD4 <sup>-</sup> Thy1 <sup>+</sup> Gr1 <sup>-</sup> )                                     |
| 612                     | 4#27         | Pre B cell <sup>b</sup>                                                                                                           |
| 506                     | 4#41         | Pre B cell <sup>b</sup>                                                                                                           |
| 552                     | 4#55         | Pre B cell <sup>b</sup>                                                                                                           |
| 544                     | 4#58         | Pre B cell <sup>b</sup>                                                                                                           |
| 550                     | 4#140        | Pre B cell <sup>b</sup>                                                                                                           |
| 423                     | 4#50         | B-cell <sup>c</sup>                                                                                                               |
| 612                     | 4#26         | Myeloid <sup>d</sup> (Mac1 <sup>+</sup> Gr1 <sup>+</sup> Thy1 <sup>+</sup> Sca1 <sup>+</sup> )                                    |
| <b><i>mcl-1(8)</i></b>  |              |                                                                                                                                   |
| 470                     | 8#36         | Primitive progenitor cell <sup>a</sup> (CD4 <sup>+</sup> Thy1 <sup>-</sup> Gr1 <sup>-</sup> )                                     |
| 505                     | 8#51         | Primitive progenitor cell <sup>a</sup> (CD4 <sup>+</sup> Thy1 <sup>+</sup> Gr1 <sup>+</sup> )                                     |
| 506                     | 8#87         | Primitive progenitor cell <sup>a</sup> (CD4 <sup>+</sup> Thy1 <sup>-</sup> Gr1 <sup>-</sup> )                                     |
| 456                     | 8#9          | Pre B cell <sup>b</sup>                                                                                                           |
| 571                     | 8#70         | Pre B cell <sup>b</sup>                                                                                                           |
| 499                     | 8#94         | Pre B cell <sup>b</sup>                                                                                                           |
| <b><i>mcl-1(37)</i></b> |              |                                                                                                                                   |
| 493                     | 37#45        | Pre B cell <sup>b</sup>                                                                                                           |
| 526                     | 37#46        | Pre B cell <sup>b</sup>                                                                                                           |
| 582                     | 37#37        | Myeloid <sup>d</sup> (Mac1 <sup>+</sup> Sca1 <sup>+</sup> )                                                                       |
| 556                     | 37#56        | CD4 <sup>+</sup> T cell                                                                                                           |

<sup>a</sup> Primitive progenitor cell tumors were all Sca1<sup>+</sup>B220<sup>+</sup>CD19<sup>-</sup>IgM<sup>-</sup>IgD<sup>-</sup> and varied for CD4, Thy1, Gr1 and other markers as indicated.

<sup>b</sup>Pre-B cell tumors were B220<sup>+</sup>CD19<sup>+</sup>IgM<sup>-</sup>IgD<sup>-</sup>

<sup>c</sup>B cell tumors were B220<sup>+</sup>Ig<sup>+</sup>

<sup>d</sup>myeloid tumors were Mac1<sup>+</sup> and/or Gr1<sup>+</sup> and lacked any lymphoid markers.

**Table S3. Phenotype of tumors arising in *bim*<sup>+/-</sup> vavP-*mcl-1* mice**

| <i>Age (d)</i> | <i>Mouse</i> | <i>Immunophenotype</i>                                                                        |
|----------------|--------------|-----------------------------------------------------------------------------------------------|
| 198            | #64          | Primitive progenitor cell <sup>a</sup> (CD4 <sup>+</sup> Thy1 <sup>+</sup> Gr1 <sup>-</sup> ) |
| 491            | #81          | Primitive progenitor cell <sup>a</sup> (CD4 <sup>+</sup> Thy1 <sup>+</sup> Gr1 <sup>-</sup> ) |
| 545            | #62          | Pre B <sup>b</sup>                                                                            |
| 400            | #80          | Pre B <sup>b</sup>                                                                            |
| 555            | #84          | Pre B <sup>b</sup>                                                                            |
| 555            | #85          | Pre B <sup>b</sup>                                                                            |
| 441            | #115         | Pre B <sup>b</sup>                                                                            |
| 546            | #116         | Pre B <sup>b</sup>                                                                            |
| 415            | #122         | Pre B <sup>b</sup>                                                                            |
| 390            | #83          | CD4 <sup>+</sup> T cell                                                                       |

<sup>a</sup>Primitive progenitor cell tumors were all Sca1<sup>+</sup>B220<sup>+</sup>CD19<sup>-</sup>IgM<sup>-</sup>IgD<sup>-</sup> and varied for CD4, Thy1, Gr1 and other markers as indicated.

<sup>b</sup>Pre-B cell tumors were B220<sup>+</sup>CD19<sup>+</sup>IgM<sup>-</sup>IgD<sup>-</sup>

**Table S4. Phenotype of tumors arising in *vavP-mcl-1/Eμ-myc* mice**

| <i>Age (d)</i> | <i>Mouse</i> | <i>Immunophenotype</i>                                                                           |
|----------------|--------------|--------------------------------------------------------------------------------------------------|
| 34             | #40          | B-cell <sup>a,c</sup>                                                                            |
| 34             | #52          | B-cell <sup>a,c</sup>                                                                            |
| 30             | #75          | B-cell <sup>a,c</sup>                                                                            |
| 27             | #126         | B-cell <sup>a,c</sup>                                                                            |
| 31             | #160         | Pre-B <sup>a,d</sup>                                                                             |
| 25             | #294         | B-cell <sup>a,c</sup>                                                                            |
| 47             | #773         | Primitive progenitor cell <sup>b,e</sup> (CD4 <sup>+</sup> Thy1 <sup>+</sup> Gr1 <sup>+</sup> )  |
| 51             | #774         | Primitive progenitor cell <sup>b,e</sup> (CD4 <sup>+</sup> Thy1 <sup>+</sup> Gr1 <sup>lo</sup> ) |
| 47             | #781         | Primitive progenitor cell <sup>b,e</sup> (CD4 <sup>+</sup> Thy1 <sup>+</sup> Gr1 <sup>+</sup> )  |
| 51             | #782         | Primitive progenitor cell <sup>b,e</sup> (CD4 <sup>+</sup> Thy1 <sup>+</sup> Gr1 <sup>-</sup> )  |
| 51             | #783         | Primitive progenitor cell <sup>b,e</sup> (CD4 <sup>+</sup> Thy1 <sup>lo</sup> Gr1 <sup>-</sup> ) |
| 36             | #816         | Primitive progenitor cell <sup>b,e</sup> (CD4 <sup>+</sup> Thy1 <sup>+</sup> Gr1 <sup>+</sup> )  |
| 38             | #817         | Primitive progenitor cell <sup>b,e</sup> (CD4 <sup>+</sup> Thy1 <sup>+</sup> Gr1 <sup>+</sup> )  |
| 38             | #818         | Primitive progenitor cell <sup>b,e</sup> (CD4 <sup>+</sup> Thy1 <sup>+</sup> Gr1 <sup>+</sup> )  |
| 36             | #819         | Primitive progenitor cell <sup>b,e</sup> (CD4 <sup>+</sup> Thy1 <sup>+</sup> Gr1 <sup>+</sup> )  |
| 36             | #820         | Primitive progenitor cell <sup>b,e</sup> (CD4 <sup>+</sup> Thy1 <sup>+</sup> Gr1 <sup>+</sup> )  |
| 36             | #821         | Primitive progenitor cell <sup>b,e</sup> (CD4 <sup>+</sup> Thy1 <sup>+</sup> Gr1 <sup>+</sup> )  |
| 44             | #837         | Primitive progenitor cell <sup>b,e</sup> (CD4 <sup>+</sup> Thy1 <sup>+</sup> Gr1 <sup>+</sup> )  |

<sup>a</sup>Tumors arising in mice from conventional transgenic cross

<sup>b</sup>Tumors arising in mice reconstituted with *vavP-mcl-1/Eμ-myc* fetal liver cells

<sup>c</sup>B cell tumors were B220<sup>+</sup>CD19<sup>+</sup>IgM<sup>+</sup>/IgD<sup>+</sup>

<sup>d</sup>Pre-B cell tumors were B220<sup>+</sup>CD19<sup>+</sup>IgM<sup>-</sup>IgD<sup>-</sup>

<sup>e</sup>Primitive progenitor cell tumors were all Sca1<sup>+</sup>B220<sup>+</sup>CD19<sup>-</sup>IgM<sup>-</sup>IgD<sup>-</sup> and varied for CD4, Thy1, Gr1 and other markers as indicated.

**Figure S1. Frequency of RBCs, circulating platelets and marrow megakaryocytes in *mcl-1* transgenic mice**

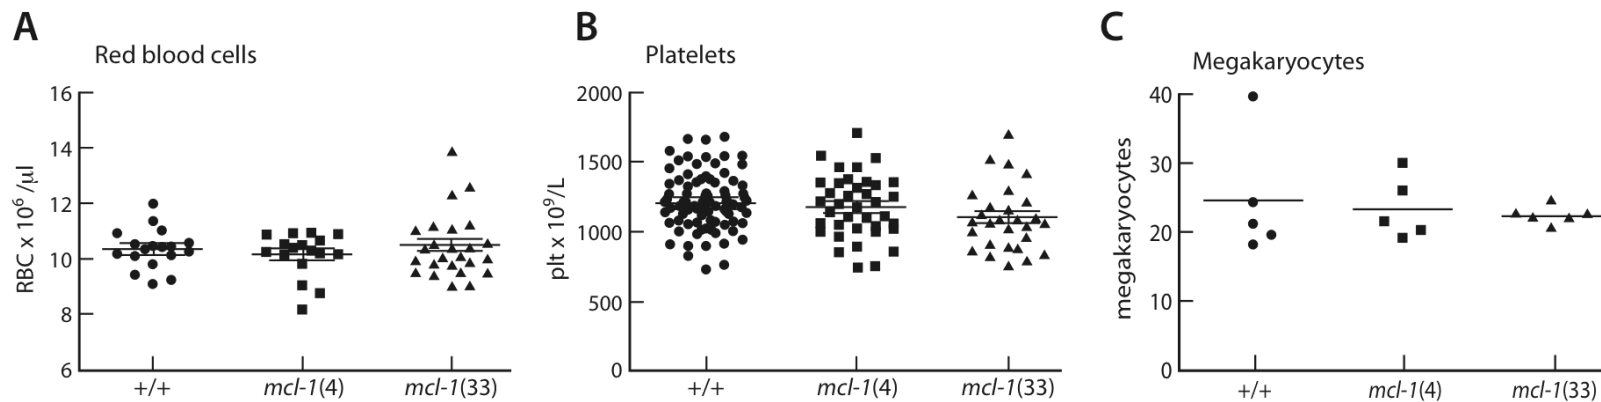

(A, B) Peripheral blood cells from 6-8 wk old mice were quantified using an ADVIA hematology analyzer. (A) Red blood cell count: WT  $10.37 \times 10^6/\mu\text{l} \pm 0.17$ ,  $n=18$ ; *mcl-1(4)*  $10.17 \pm 0.19$ ,  $n=17$ ; *mcl-1(33)*  $10.48 \pm 0.23$ ,  $n=25$ . (B) Platelet count: WT  $1218 \times 10^9/\text{L} \pm 21.82$ ,  $n=86$ ; *mcl-1(4)*  $1187 \pm 36.12$ ,  $n=38$ ; *mcl-1(33)*  $1100 \pm 43.94$ ,  $n=28$ ; WT versus *mcl-1(33)* \* $P=0.01$  (Student T Test). (C) Sternum megakaryocytes from 6-8 wk old male mice, expressed as counts per 3 fields (x 200 magnification): WT  $24.7 \pm 3.8$ ,  $n=5$ ; *mcl-1(4)*  $23.5 \pm 2$ ,  $n=5$ ; *mcl-1(33)*  $22.4 \pm 0.5$ ,  $n=6$ . Values represent mean  $\pm$  SEM.

**Figure S2. Elevated Mcl-1 protects peripheral T cells against apoptosis *in vitro***

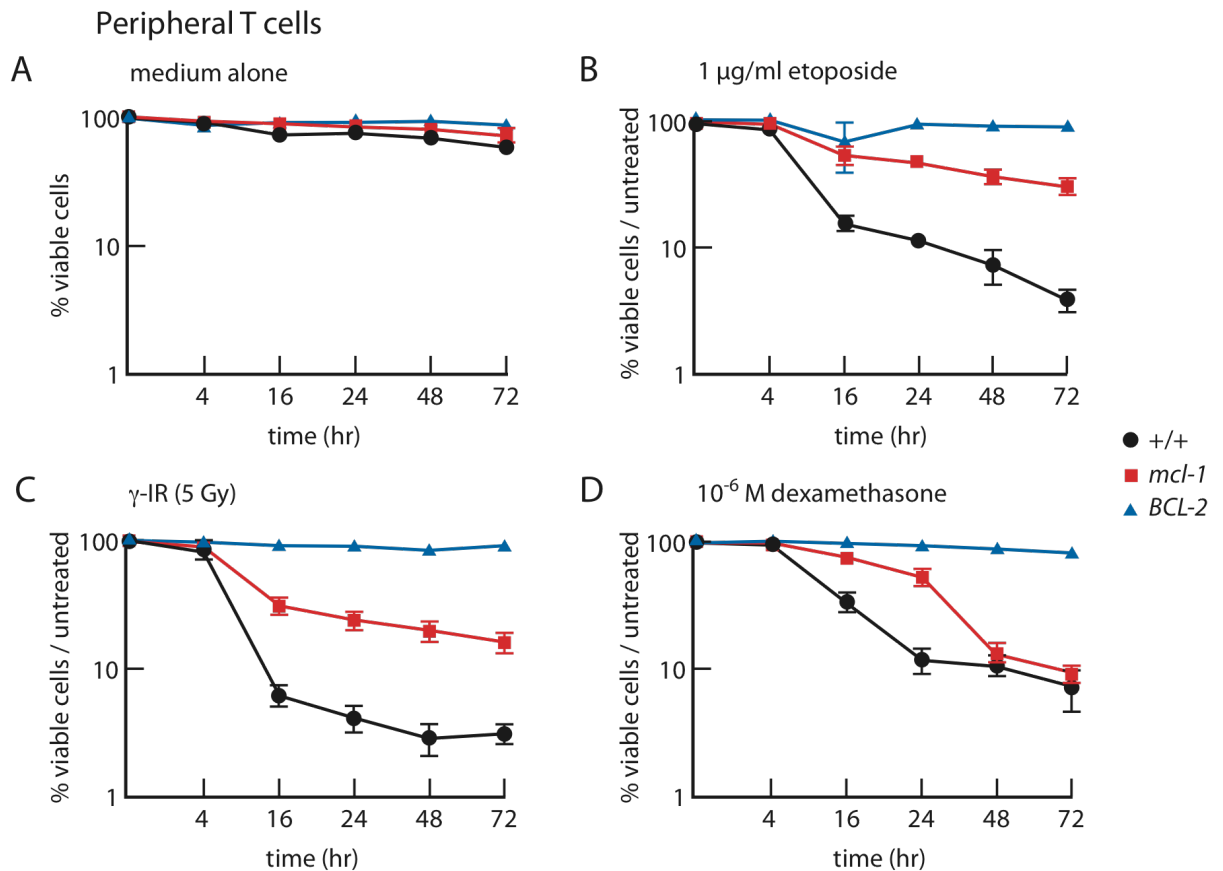

Thy1<sup>+</sup> T cells sorted from LNs of individual WT (black, n=7-9), *vavP-mcl-1*(33) (red, n=7-9) and *vavP-BCL-2* mice (blue, n=4) were cultured *in vitro* for 3 d without cytokines (A) or after exposure to  $\gamma$ -irradiation (5 Gy) (C) or in the presence of 1  $\mu$ g/ml etoposide (B) or 10<sup>-6</sup>M dexamethasone (D) and viability was assayed by flow cytometry (cells negative for propidium iodide uptake and annexin V surface staining) at the indicated intervals. In B, C and D, values have been normalized to viability in untreated cultures (A) to show stimuli-specific apoptosis. Values represent mean  $\pm$  SEM

**Figure S3. Elevated Mcl-1 protects peripheral B cells against apoptosis *in vitro***

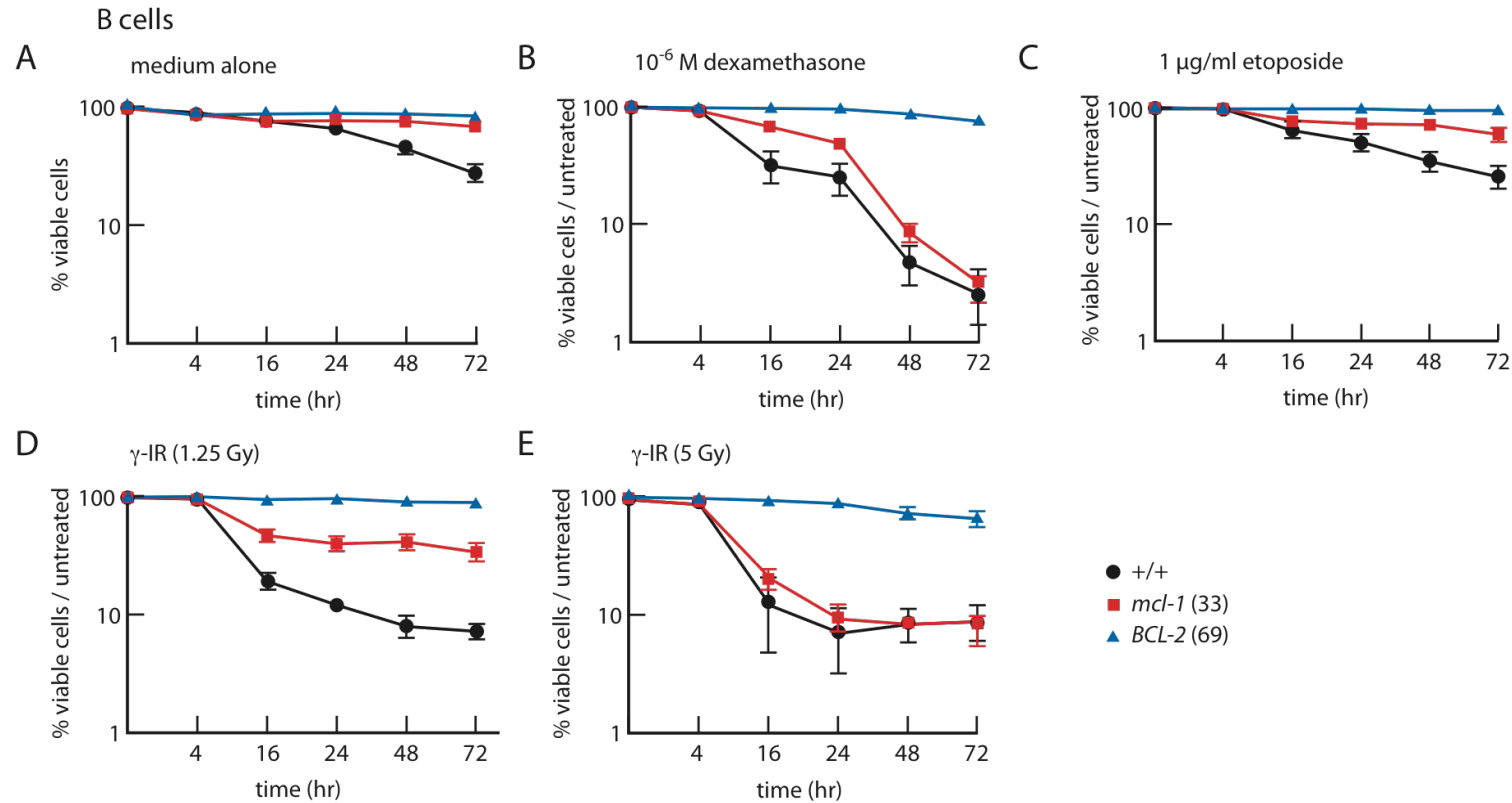

B cells (B220<sup>+</sup>) cells sorted from the LNs of individual WT (black, n=6-7), *vavP-mcl-1*(33) (red, n=7) and *vavP-BCL-2* mice (blue, n=4) were cultured *in vitro* for 3 d without cytokines (A) or after exposure to  $\gamma$ -irradiation (1.25 or 5 Gy) (D, E respectively) or in the presence of  $10^{-6}$ M dexamethasone (B) or 1  $\mu$ g/ml etoposide (C) and viability was assayed by flow cytometry (cells negative for propidium iodide uptake and annexin V surface staining) at the indicated intervals. In B to E, values have been normalized to viability in untreated cultures (A) to show stimuli-specific apoptosis. Values represent mean  $\pm$  SEM.

**Figure S4. Histopathology of *vavP-mcl-1* mice**

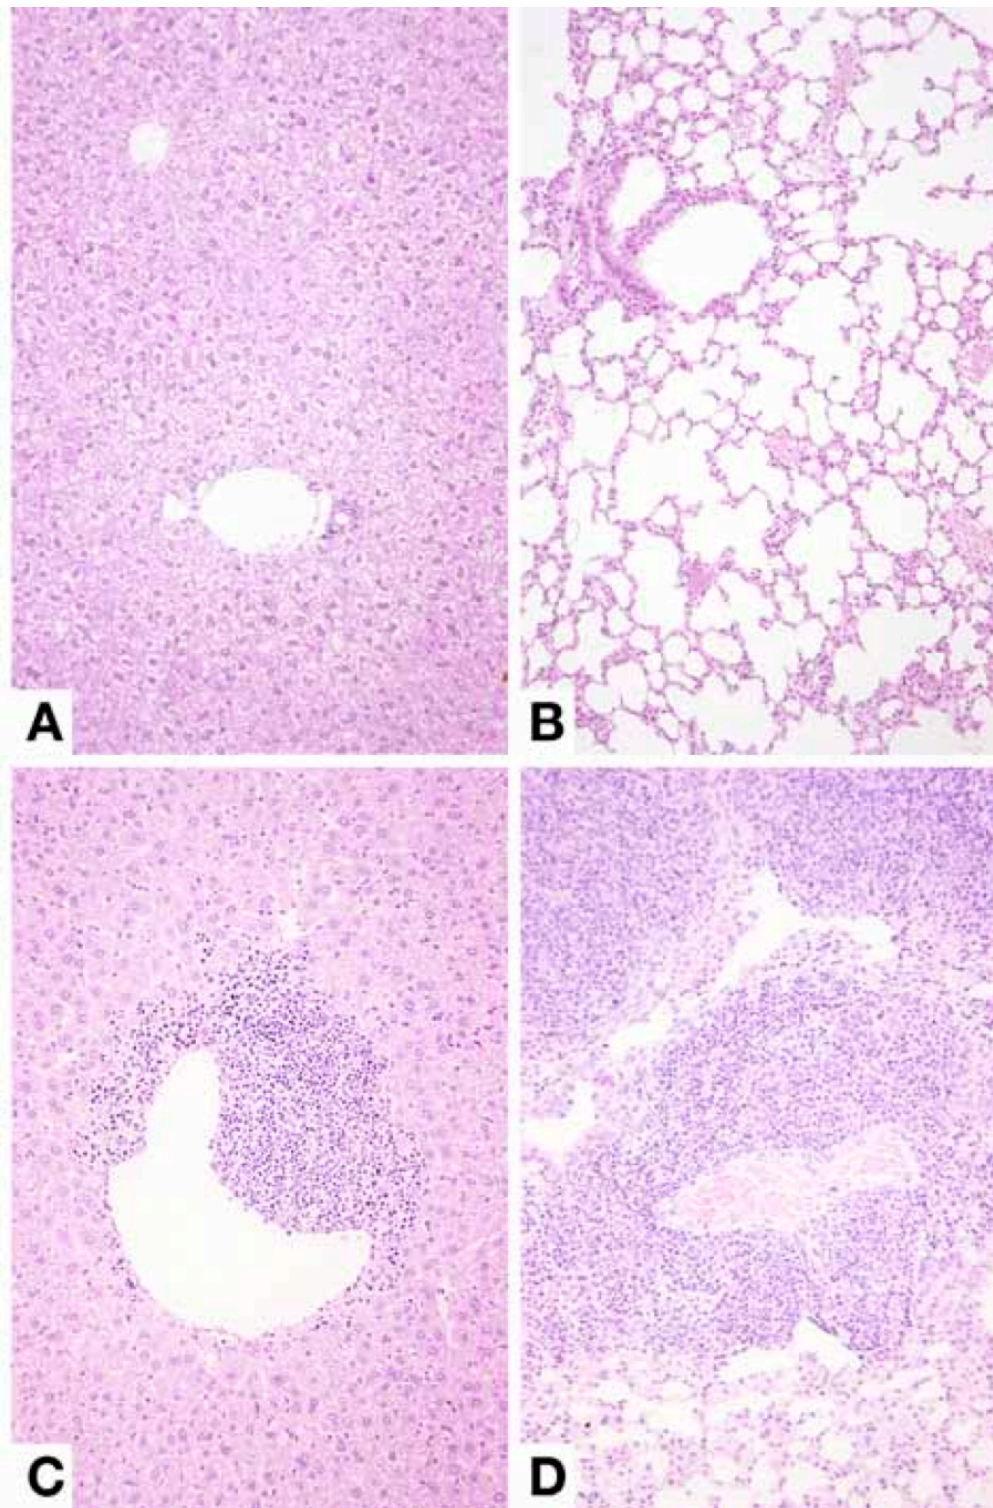

(A, B) Young (6-8 wk old) *vavP-mcl-1* transgenic mice exhibit normal histopathology in (A) liver and (B) lung. (C, D) Aged (>12 mo old) *vavP-mcl-1* transgenic mice accumulate lymphoid cells in (C) liver and (D) lung. Sections were stained with haematoxylin/eosin. Magnification X 10.
